# Supplementary material for: Teriflunomide Modulates the PD-1/PD-L1 Axis and Enhances Antitumor Immunity in Colorectal Cancer
Source: Research Square preprint supplement (doi:10.21203/rs.3.rs-7590655/v1), 2025-09-25
Supplement: Supplementary file 1 [file c5fb600a28e587c1d459d74c.xlsx]

## Sheet: DLD-1
		Sample Name	Target Name	CT
		D-C	GAPDH	17.6976		D-D	GAPDH	18.2582		D-I	GAPDH	19.1213		D-D,I	GAPDH	19.1851
		D-C	GAPDH	17.9555		D-D	GAPDH	18.0394		D-I	GAPDH	19.0491		D-D,I	GAPDH	18.9759
		D-C	GAPDH	17.8186		D-D	GAPDH	18.0034		D-I	GAPDH	19.0264		D-D,I	GAPDH	19.2055
		D-C	GAPDH	17.9264		D-D	GAPDH	18.0506		D-I	GAPDH	18.9915		D-D,I	GAPDH	19.1913
		D-C	PD-L1	35.0174		D-D	PD-L1	34.9191		D-I	PD-L1	32.1111		D-D,I	PD-L1	32.1927
		D-C	PD-L1	35.5594		D-D	PD-L1	36.538		D-I	PD-L1	32.249		D-D,I	PD-L1	32.3872
		D-C	PD-L1	35.4913		D-D	PD-L1	34.9994		D-I	PD-L1	32.0869		D-D,I	PD-L1	32.1992
		D-C	PD-L1	36.2653		D-D	PD-L1	36.5275		D-I	PD-L1	32.2801		D-D,I	PD-L1	32.8831
		D-C	PD-L1	36.5575		D-D	PD-L1	35.6783		D-I	PD-L1	32.5481		D-D,I	PD-L1	32.4369
										D-I	PD-L1	32.7246		D-D,I	PD-L1	32.5911
											D-C	D-D	D-I	D-D, I		1.57646	1.68753	11.818	11.1688
																1.0827	0.549453	10.7412	9.75987
											1.83148	1.96051	13.7297	12.9755		1.13502	1.59626	12.0182	11.1184
											1.25784	0.638335	12.4788	11.3387		0.663759	0.553446	10.512	6.9209
											1.31863	1.85448	13.9623	12.917		0.542059	0.997073	8.72977	9.42944
											0.771131	0.642975	12.2125	8.04045				7.72454	8.47319
											0.629745	1.15836	10.1419	10.9548
													8.97409	9.84386
											1.16176	1.25093	11.9166	11.0117		1.57646	1.0827	1.13502	0.663759	0.542059
																1.68753	0.549453	1.59626	0.553446	0.997073
											1.57646	1.68753	11.818	11.1688		11.818	10.7412	12.0182	10.512	8.72977	7.72454
											1.0827	0.549453	10.7412	9.75987		11.1688	9.75987	11.1184	6.9209	9.42944	8.47319
											1.13502	1.59626	12.0182	11.1184
											0.663759	0.553446	10.512	6.9209
											0.542059	0.997073	8.72977	9.42944
											0	0	7.72454	8.47319		1.57646	11.818	11.1688
											0	0	0	0		1.0827	10.7412	9.75987
											1	1.07675	10.2573	11.1688		1.13502	12.0182	11.1184
																0.663759	10.512	6.9209
																0.542059	8.72977	9.42944
																	7.72454	8.47319
																	****	****

## Sheet: Hct116
		Sample Name	Target Name	CT
		H-C	PD-L1	35.1333		H-D	PD-L1	35.3765		H-I	PD-L1	33.4634		H-D,I	PD-L1	33.7541
		H-C	PD-L1	35.9854		H-D	PD-L1	34.9294		H-I	PD-L1	33.1498		H-D,I	PD-L1	32.9644
		H-C	PD-L1	35.31		H-D	PD-L1	34.6211		H-I	PD-L1	33.6164		H-D,I	PD-L1	33.9871
		H-C	PD-L1	35.3317		H-D	PD-L1	35.9038		H-I	GAPDH	20.9694		H-D,I	GAPDH	20.9402
		H-C	GAPDH	20.6704		H-D	GAPDH	20.6781		H-I	GAPDH	20.9987		H-D,I	GAPDH	20.9883
		H-C	GAPDH	20.7448		H-D	GAPDH	20.9657		H-I	GAPDH	20.8747		H-D,I	GAPDH	20.9949
		H-C	GAPDH	20.769		H-D	GAPDH	20.5337
										H-C	H-D	H-I	H-D,I		1.20839	1.02089	3.84502	3.14333
															0.669402	1.39179	4.77863	5.43369
										1.24485	1.05169	3.96103	3.23817		1.06911	1.72336	3.458	2.6744
										0.689599	1.43378	4.92281	5.59764		1.0531	0.708372
										1.10136	1.77536	3.56233	2.7551
										1.08487	0.729745
										1.03017	1.24764	4.14872	3.86364
										1.20839	1.02089	3.84502	3.14333		1.20839	0.669402	1.06911	1.0531
										0.669402	1.39179	4.77863	5.43369		1.02089	1.39179	1.72336	0.708372
										1.06911	1.72336	3.458	2.6744		3.84502	4.77863	3.458
										1.0531	0.708372	0	0		3.14333	5.43369	2.6744
										0	0	0	0
										1	1.02089	4.02721	3.14333
															1.20839	3.84502	3.14333
															0.669402	4.77863	5.43369
															1.06911	3.458	2.6744
															1.0531
																***	***

## Sheet: RKO
		Sample Name	Target Name	CT
		R-C	PD-L1	28.6618		R-D	PD-L1	28.0076		R-I	PD-L1	26.3102		R-D,I	PD-L1	26.5791
		R-C	PD-L1	28.1867		R-D	PD-L1	28.6449		R-I	PD-L1	26.3645		R-D,I	PD-L1	26.4073
		R-C	PD-L1	28.7743		R-D	PD-L1	28.6836		R-I	PD-L1	26.4013		R-D,I	PD-L1	26.4117
		R-C	GAPDH	21.7524		R-D	GAPDH	21.7337		R-I	PD-L1	26.3444		R-D,I	PD-L1	26.3547
		R-C	GAPDH	21.6203		R-D	GAPDH	21.4729		R-I	PD-L1	26.4408		R-D,I	PD-L1	26.3614
		R-C	GAPDH	21.5902		R-D	GAPDH	21.7069		R-I	GAPDH	20.9928		R-D,I	GAPDH	20.8105
										R-I	GAPDH	21.0753		R-D,I	GAPDH	21.1613
										R-I	GAPDH	20.8877		R-D,I	GAPDH	20.8558
										H-C	H-D	H-I	H-D,I		0.904981	1.42424	4.61888	3.83353
															1.2579	0.915677	4.44825	4.31844
															0.837118	0.891426	4.33641	4.30515
										0.438987	0.690869	2.24052	1.85956				4.51076	4.47869
										0.610182	0.444176	2.15775	2.09478				4.21918	4.45789
										0.406069	0.432412	2.1035	2.08834
												2.18808	2.17252
												2.04664	2.16243
															0.904981	1.2579	0.837118
										0.485079	0.522486	2.1473	2.07553		1.42424	0.915677	0.891426
															4.61888	4.44825	4.33641	4.51076	4.21918
										0.904981	1.42424	4.61888	3.83353		3.83353	4.31844	4.30515	4.47869	4.45789
										1.2579	0.915677	4.44825	4.31844
										0.837118	0.891426	4.33641	4.30515
										0	0	4.51076	4.47869
										0	0	4.21918	4.45789		0.904981	4.61888	3.83353
										0	0	0	0		1.2579	4.44825	4.31844
										1	1.07711	4.42669	4.27874		0.837118	4.33641	4.30515
																4.51076	4.47869
																4.21918	4.45789
																****	****
