# Supplementary material for: Teriflunomide Modulates the PD-1/PD-L1 Axis and Enhances Antitumor Immunity in Colorectal Cancer
Source: Research Square preprint supplement (doi:10.21203/rs.3.rs-7590655/v1), 2025-09-25
Supplement: Supplementary file 1 [file e3c912a0f86d9bb86b3428c6.pdf]

## Supplementary Information

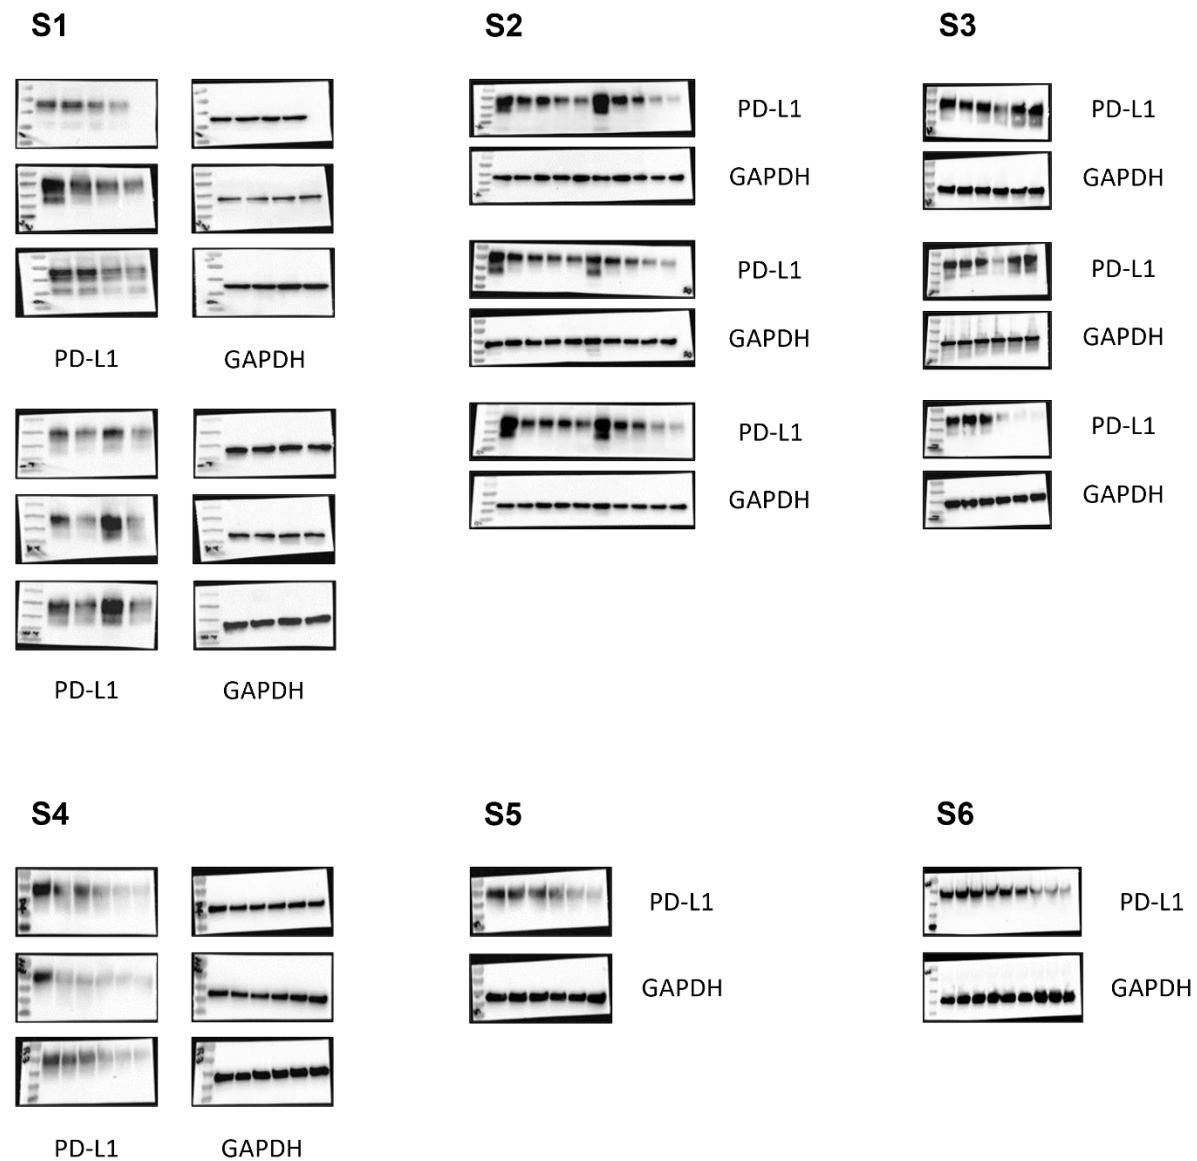

**Supplementary Figure.** This figure presents the original, uncropped Western blot images corresponding to the data shown in the main figures. The blots displayed in panels S1, S2, S3, S4, S5, and S6 correspond to those presented in Figure 1B–C, Figure 1E, Figure 1F, Figure 2C, Figure 5C, and Figure 6F, respectively.
